# Supplementary material
Source: publisher figshare collection journal article supplement (https://acs.figshare.com/ndownloader/files/5141140)
Supplement: Supplementary file 1 [file 5141140]

Supporting Information for

**Highly Efficient Blue-Light-Emitting Glass-Forming Molecules Based on Tetraarylmethane/silane and Fluorene: Synthesis, Thermal, Optical and Electrochemical Properties**

Xue-Ming Liu, Chaobin He\*, Junchao Huang and Jingmei Xu

3 Research Link, Institute of Materials Research & Engineering, National University of Singapore, Singapore 117602

**Content:**  $^1\text{H}$  NMR,  $^{13}\text{C}$  NMR, and MS spectra for all the five new compounds.

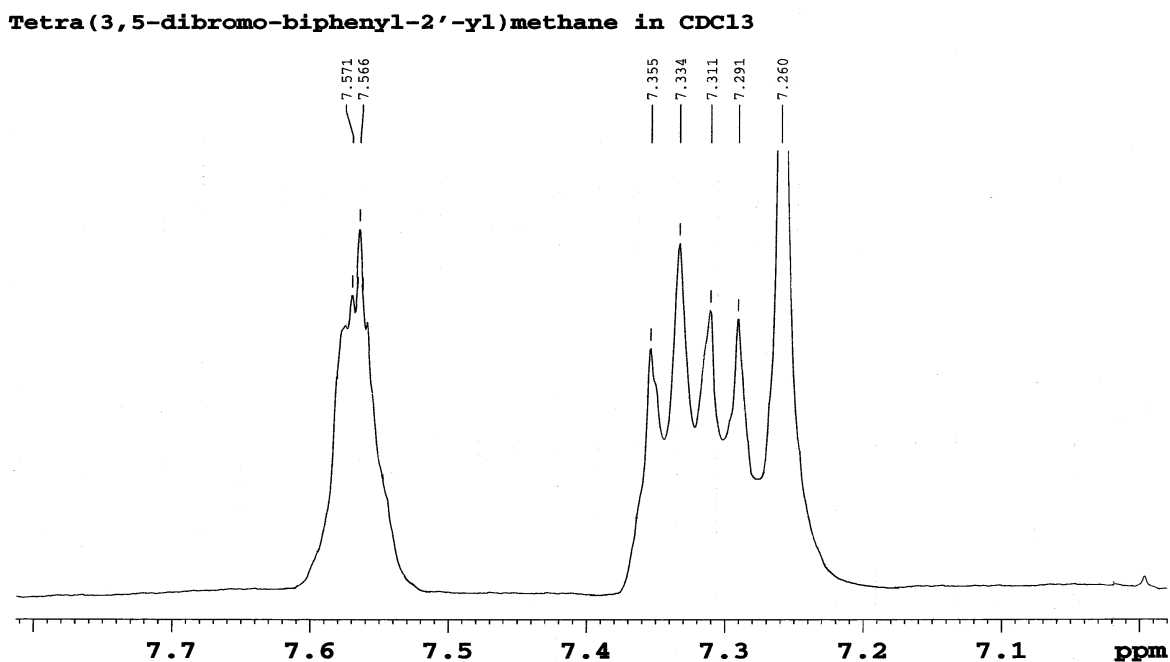

**Figure S1.** The  $^1\text{H}$  NMR spectrum of **4** in  $\text{CDCl}_3$ .

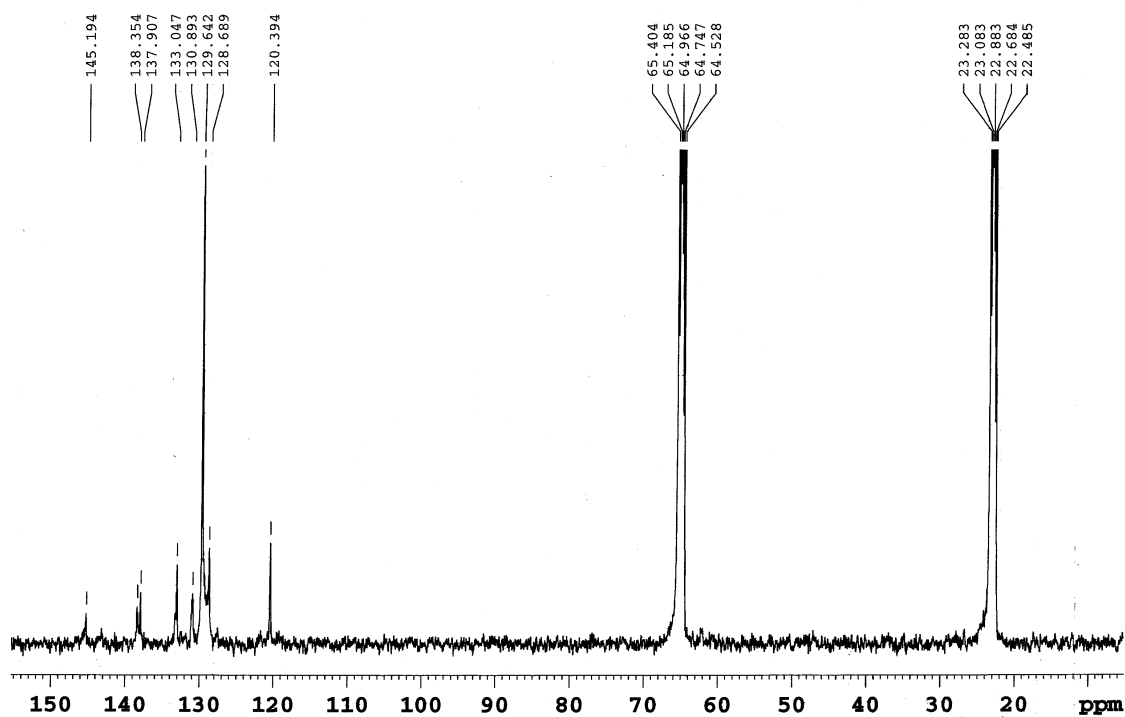

Figure S2. The <sup>13</sup>C NMR spectrum of 4 in THF-d<sub>8</sub>.

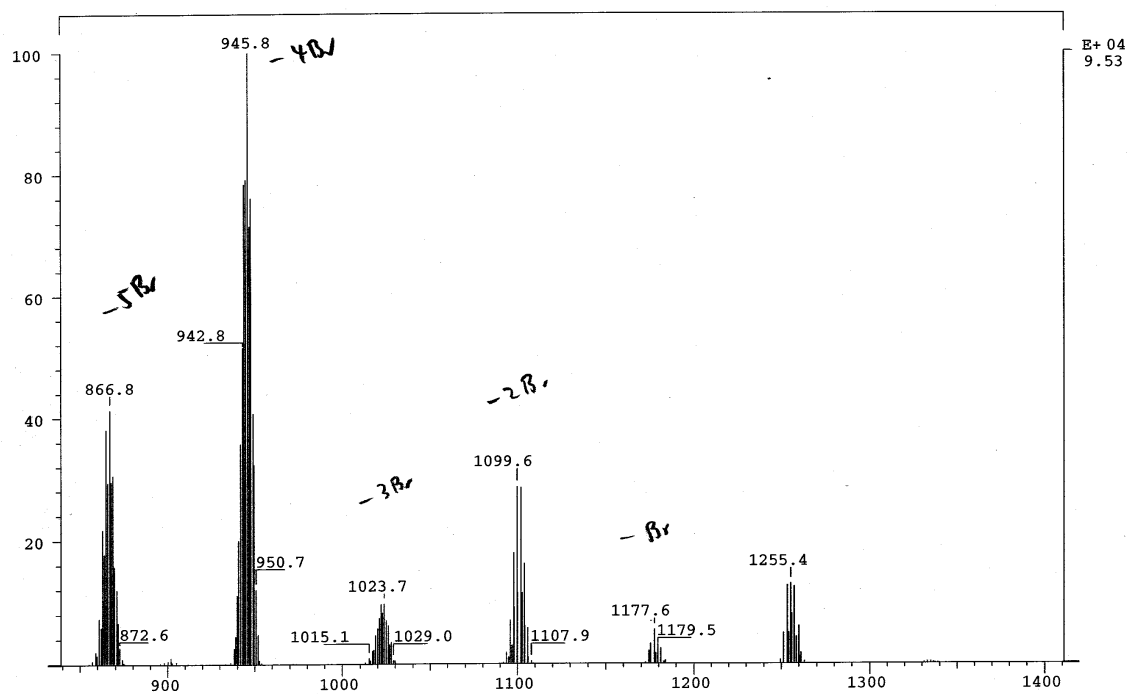

Figure S3. The EI-MS spectrum of compound 4.

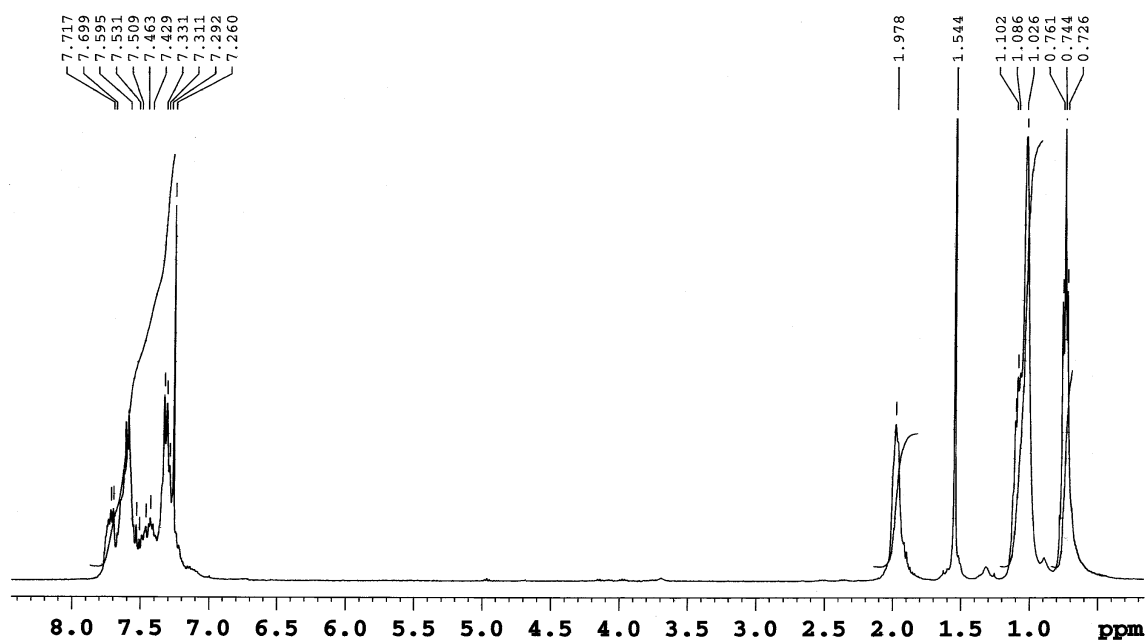

Figure S4. The <sup>1</sup>H NMR spectrum of **5** in CDCl<sub>3</sub>.

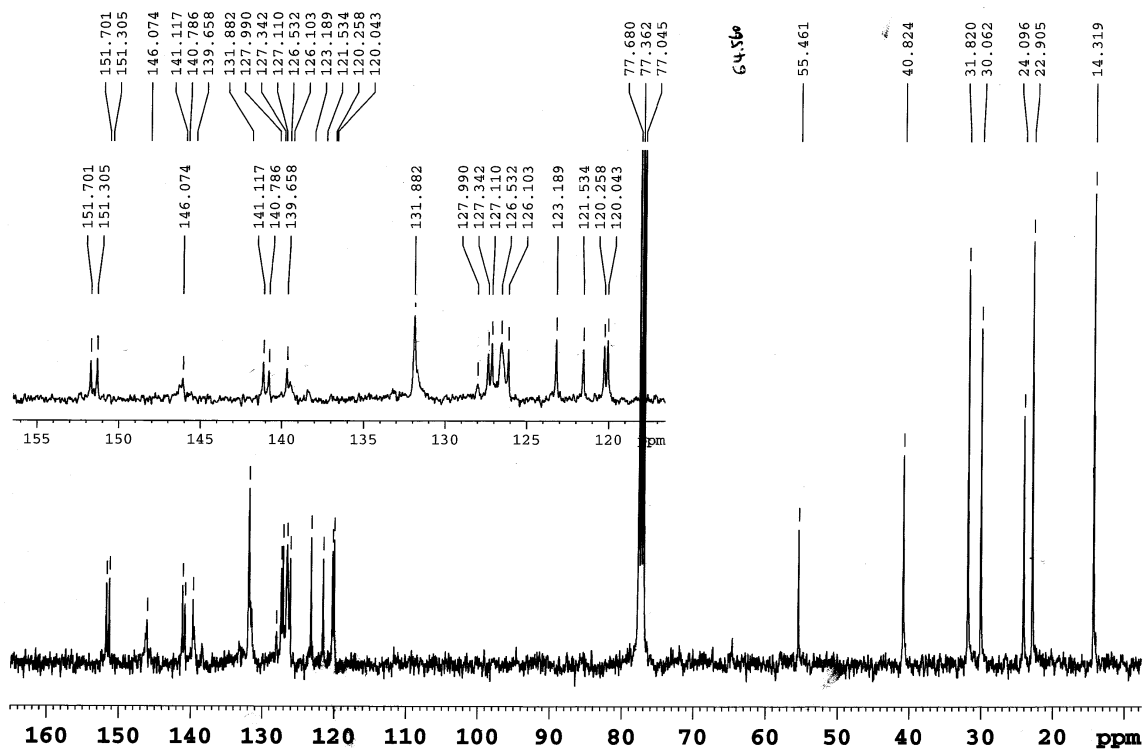

Figure S5. The <sup>13</sup>C NMR spectrum of **5** in CDCl<sub>3</sub>.

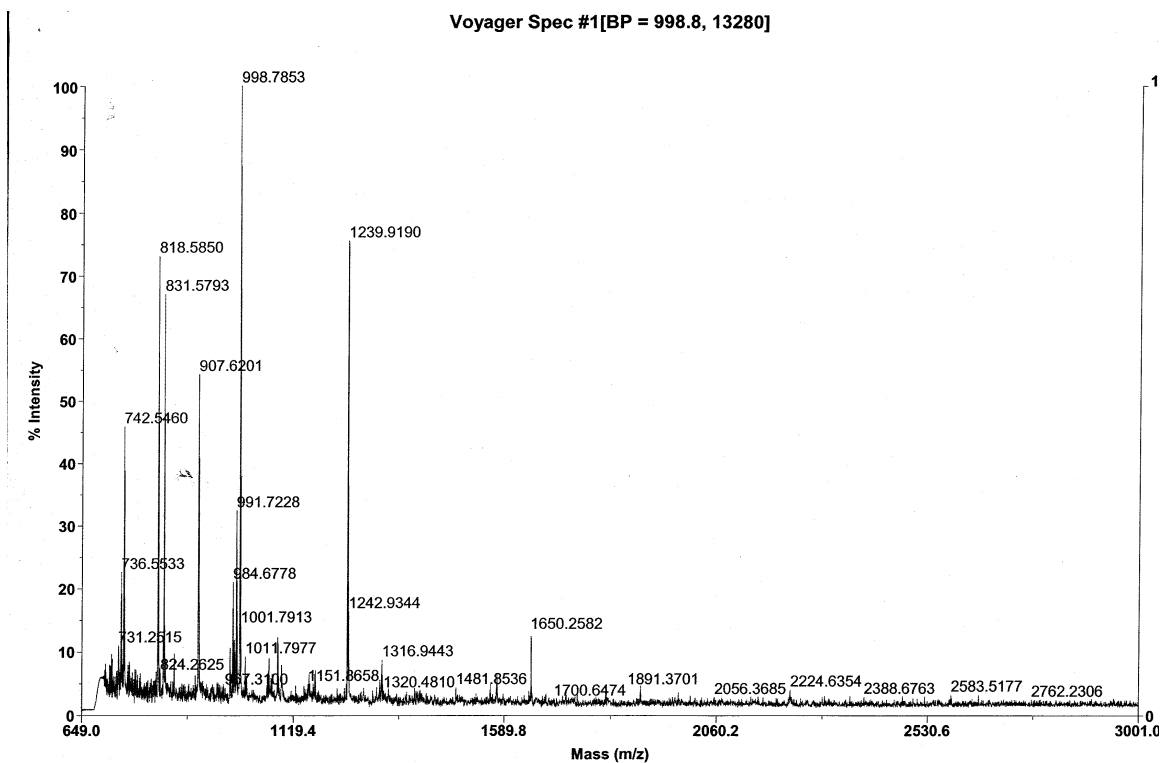

Figure S6. The MALDI-TOF MS spectrum of **5** (Linear mode)

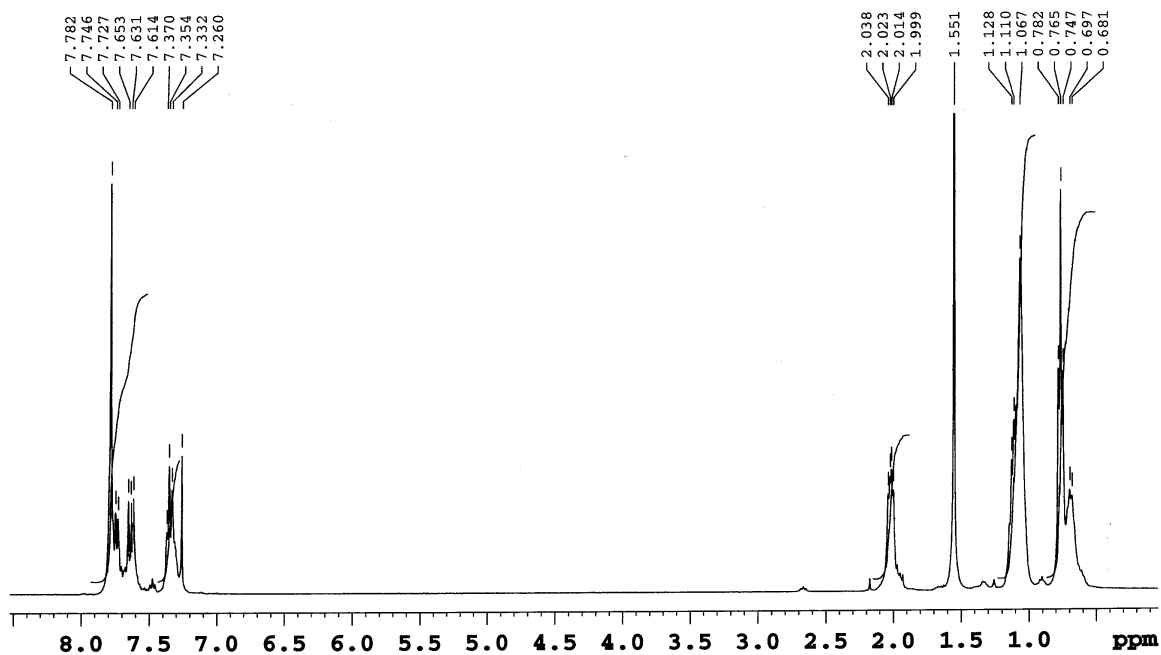

Figure S7. The  $^1\text{H}$  NMR spectrum of **6** in  $\text{CDCl}_3$ .

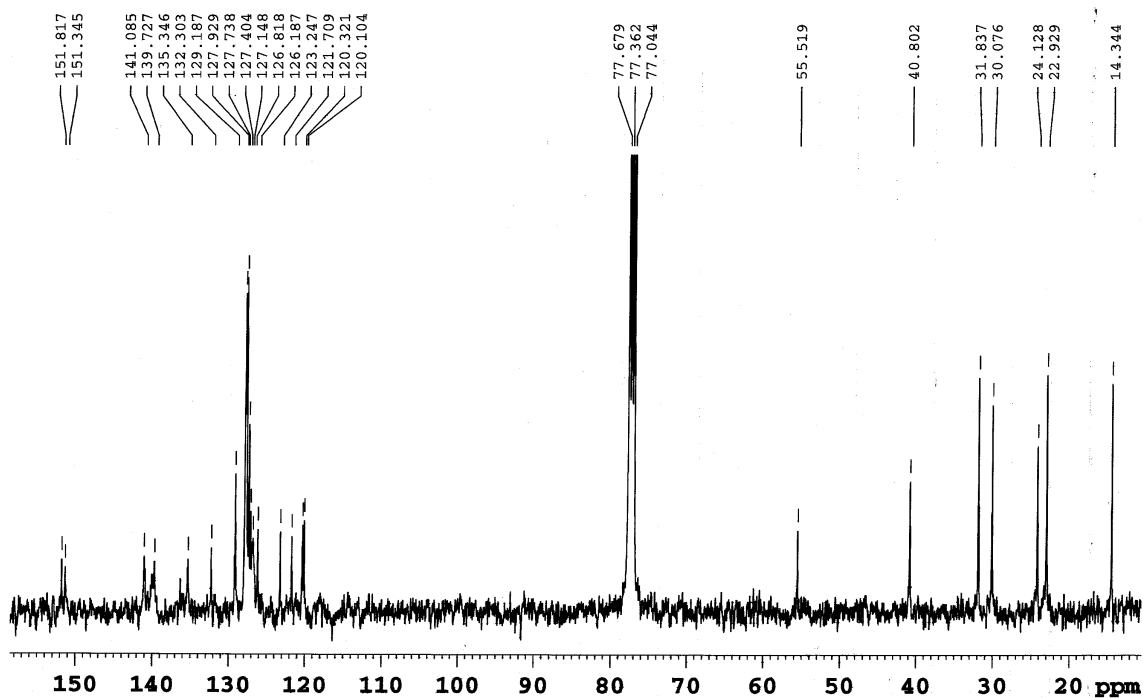

Figure S8. The  $^{13}\text{C}$  NMR spectrum of **6** in  $\text{CDCl}_3$ .

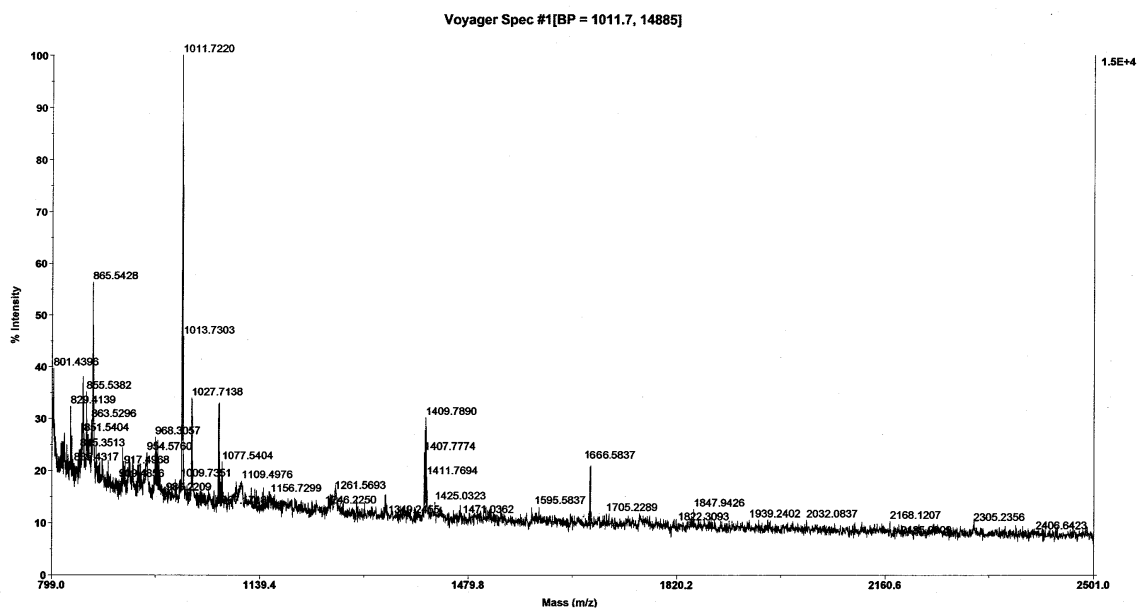

Figure S9. The MALDI-TOF MS spectrum of **6** (Linear mode)

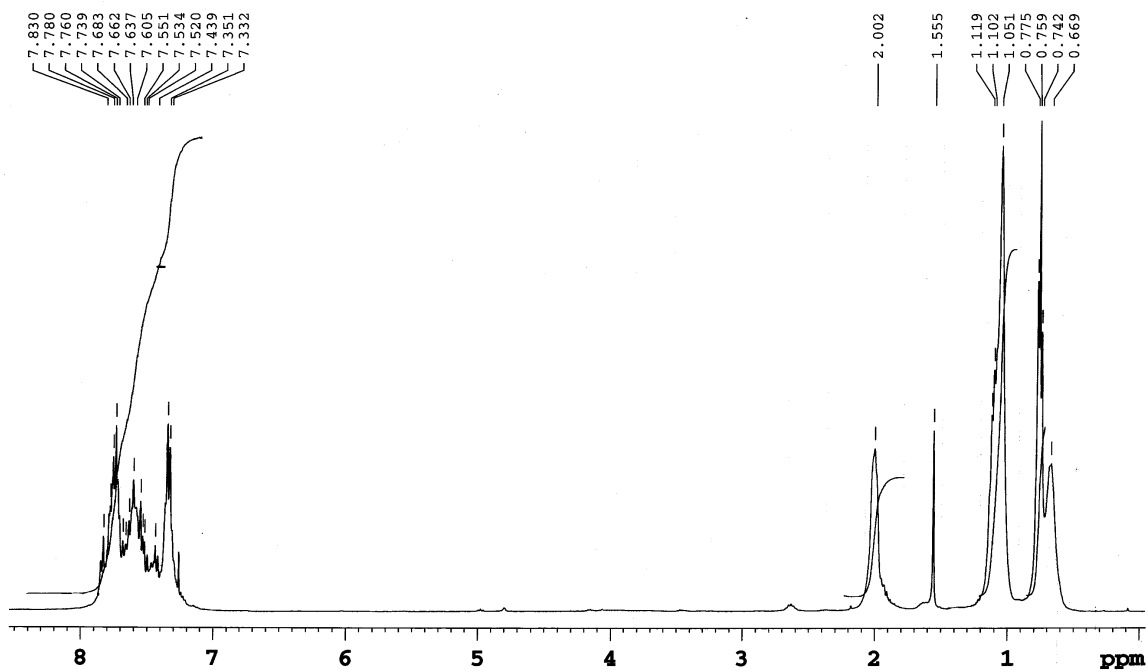

Figure S10. The <sup>1</sup>H NMR spectrum of **7** in CDCl<sub>3</sub>.

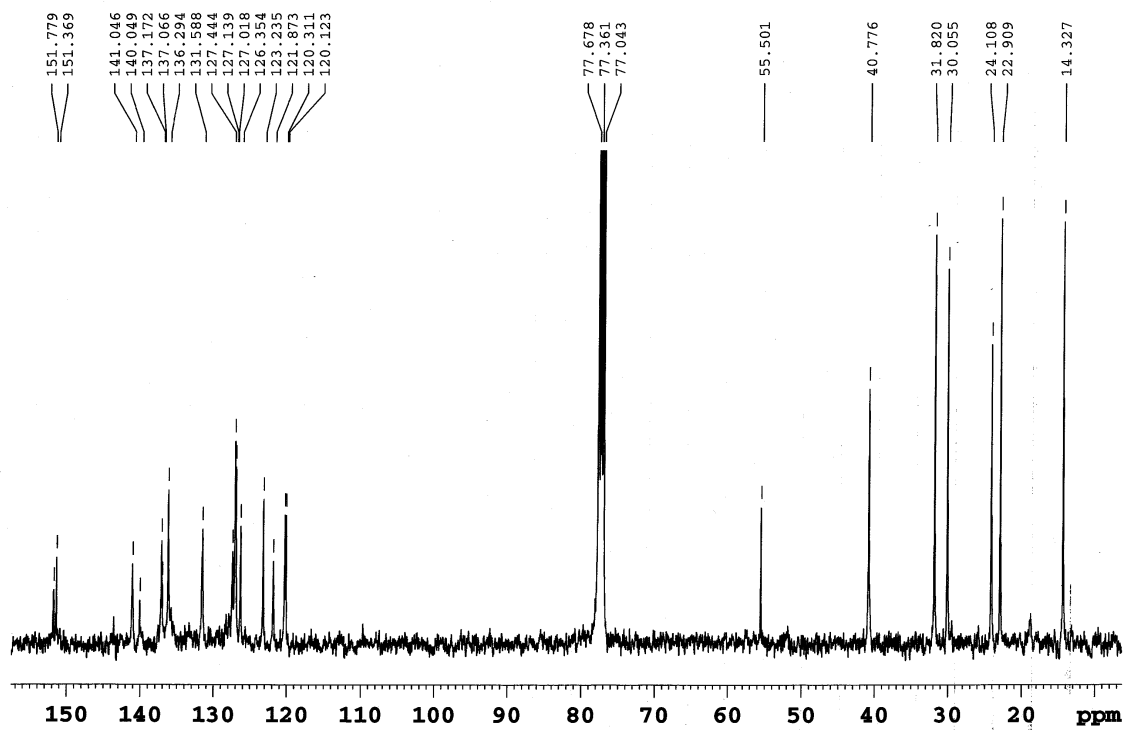

Figure S11. The <sup>13</sup>C NMR spectrum of **7** in CDCl<sub>3</sub>.

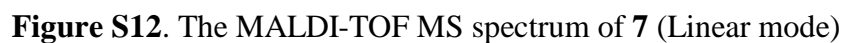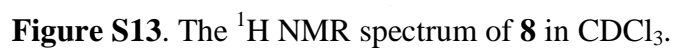

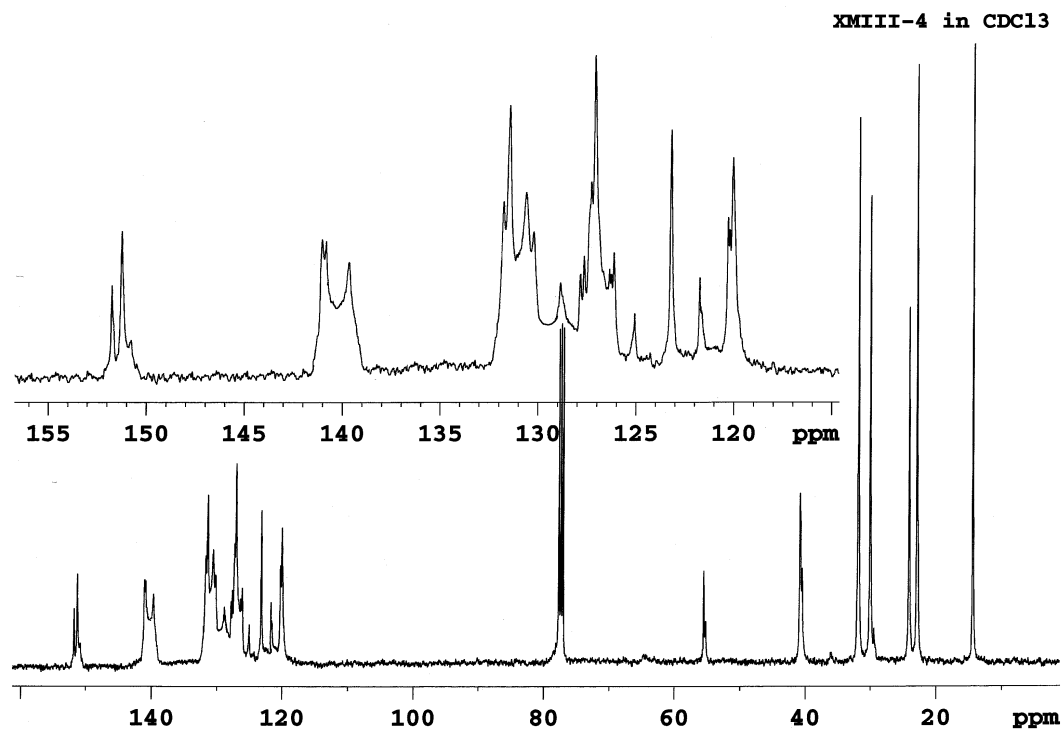

Figure S14. The  $^{13}\text{C}$  NMR spectrum of **8** in  $\text{CDCl}_3$ .

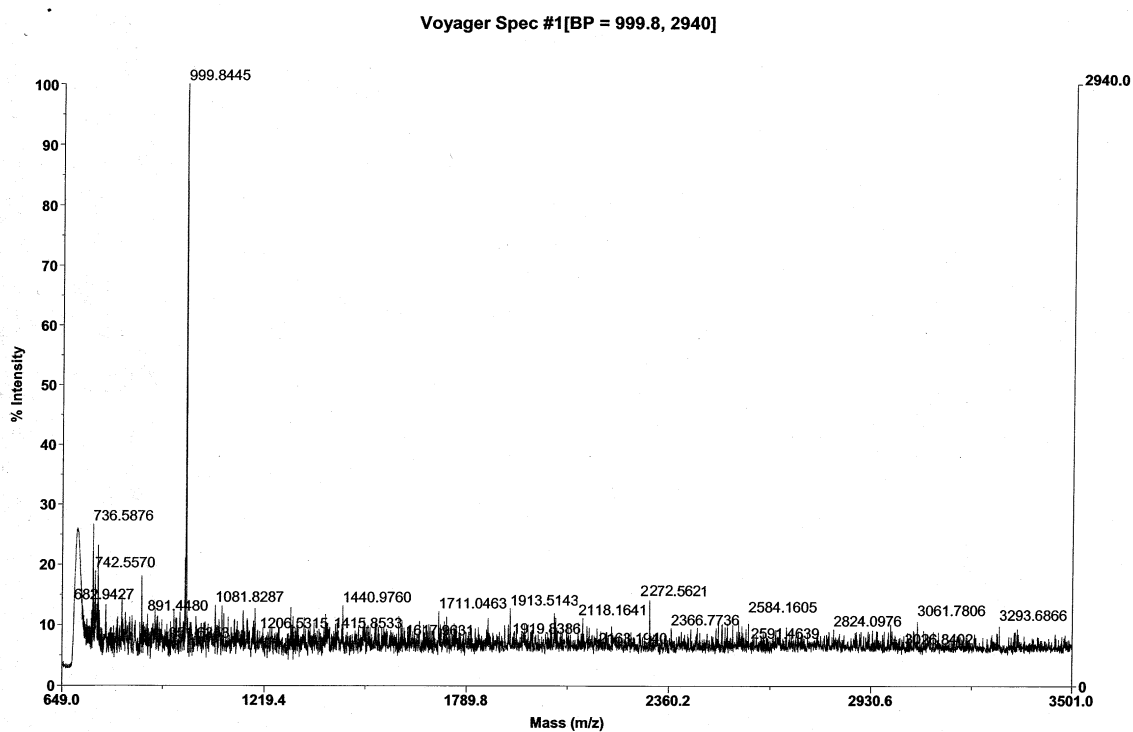

Figure S15. The MALDI-TOF MS spectrum of **8** (Linear mode)
